# Supplementary material for: [AEPH2][GeSb2S6]·CH3OH: a thiogermanate–thioantimonate featuring an infinite ribbon-like structure with an unusual {GeSb3S11} unit and exhibiting the ability of photocatalytic degradation of organic dye
Source: Royal Society of Chemistry journal article supplement (doi:10.1039/c3ce40143j), 2013-01-01
Supplement: c3ce40143j.pdf [file c3ce40143j.pdf]

**[AEPH<sub>2</sub>][GeSb<sub>2</sub>S<sub>6</sub>]·CH<sub>3</sub>OH: a thiogermanate-thioantimonate  
featuring an infinite ribbon-like structure with an unusual {GeSb<sub>3</sub>S<sub>11</sub>}  
unit and exhibiting the ability of photocatalytic degradation of  
organic dye**

**Mei-Ling Feng, Chun-Li Hu, Kai-Yao Wang, Cheng-Feng Du and Xiao-Ying Huang\***

State Key Laboratory of Structural Chemistry, Fujian Institute of Research on the Structure of Matter,  
Chinese Academy of Sciences, Fuzhou, Fujian 350002, P. R. China. Fax: (+86) 591-83793727  
E-mail: xyhuang@fjirsm.ac.cn

**Supporting Information**

**1. Synthesis**

[AEPH<sub>2</sub>][GeSb<sub>2</sub>S<sub>6</sub>]·CH<sub>3</sub>OH (**1**) was prepared from a mixture of GeO<sub>2</sub> (0.052 g, 0.5 mmol), Sb<sub>2</sub>S<sub>3</sub> (0.165 g, 0.49 mmol), S (0.093 g, 2.90 mmol), 1 mL N-(2-aminoethyl)piperazine and 3 mL CH<sub>3</sub>OH, which was sealed in a stainless steel reactor with a 20 mL Teflon liner, heated at 160 °C for 7 days and then spontaneously cooled to room temperature. After the product was filtrated, the yellow clubbed crystals of **1** and a small number of indefinite yellow powder were obtained. The crystalline products of **1** were selected by hand, washed by ethanol, and air-dried (Yield: 0.201 g, 61% based on Sb). Anal. calc. for C<sub>7</sub>H<sub>21</sub>GeN<sub>3</sub>OS<sub>6</sub>Sb<sub>2</sub> **1**: C, 12.52%; H, 3.15%; N, 6.26%. Found: C, 12.45%; H, 3.21%; N, 6.64%.

**2. Crystal Structure**

The intensity data of **1** was collected on a Xcalibur E Oxford diffractometer with graphite-monochromated MoK $\alpha$  radiation ( $\lambda = 0.71073$  Å) at room temperature. The structure was solved by direct methods and refined by full-matrix least-squares on  $F^2$  using

the SHELX97 program package.<sup>1</sup> Non-hydrogen atoms were refined with anisotropic displacement parameters and the hydrogen atoms attached to the C, N and O atoms in compound **1** are located at geometrically calculated positions. The methanol molecule in compound **1** showed positional disorder and was split into two non-equivalent positions with refined SOFs of 0.652(14) and 0.348(14), respectively. The empirical formula was confirmed by the TGA and EA results. Selected bond lengths and angles of compound **1** are listed in Table S1. Selected hydrogen-bonding data of compound **1** are listed in Table S2.

**Table S1.** Selected bond lengths (Å) and angles (°) for [AEPH<sub>2</sub>][GeSb<sub>2</sub>S<sub>6</sub>].CH<sub>3</sub>OH (**1**).

| <b>1</b>          |            | <b>1</b>            |            |
|-------------------|------------|---------------------|------------|
| Sb(1)-S(5)        | 2.3690(14) | Sb(2)-S(6)#2        | 2.4409(14) |
| Sb(1)-S(1)#1      | 2.5207(14) | Sb(2)-S(6)          | 2.5002(13) |
| Sb(1)-S(3)        | 2.5279(14) | Sb(2)-S(2)          | 2.6034(14) |
| Ge(1)-S(4)        | 2.1503(16) | Sb(2)-S(5)#3        | 2.9308(16) |
| Ge(1)-S(2)        | 2.2211(15) | Sb(2)-S(5)          | 3.1810(15) |
| Ge(1)-S(1)        | 2.2234(14) |                     |            |
| Ge(1)-S(3)        | 2.2573(13) |                     |            |
|                   |            |                     |            |
| S(5)-Sb(1)-S(1)#1 | 93.46(5)   | S(6)#2-Sb(2)-S(6)   | 90.66(4)   |
| S(5)-Sb(1)-S(3)   | 95.68(5)   | S(6)#2-Sb(2)-S(2)   | 87.78(5)   |
| S(1)#1-Sb(1)-S(3) | 89.31(5)   | S(6)-Sb(2)-S(2)     | 84.74(4)   |
| S(4)-Ge(1)-S(2)   | 111.65(5)  | S(6)#2-Sb(2)-S(5)#3 | 85.48(5)   |
| S(4)-Ge(1)-S(1)   | 115.62(6)  | S(6)-Sb(2)-S(5)#3   | 89.61(4)   |
| S(2)-Ge(1)-S(1)   | 110.12(6)  | S(2)-Sb(2)-S(5)#3   | 171.16(4)  |
| S(4)-Ge(1)-S(3)   | 108.88(6)  | S(6)#2-Sb(2)-S(5)   | 85.06(4)   |
| S(2)-Ge(1)-S(3)   | 106.45(6)  | S(6)-Sb(2)-S(5)     | 170.75(4)  |
| S(1)-Ge(1)-S(3)   | 103.40(5)  | S(2)-Sb(2)-S(5)     | 86.89(4)   |
|                   |            | S(5)#3-Sb(2)-S(5)   | 98.21(4)   |

Symmetric codes: #1 *x*+1, *y*, *z*; #2 *x*+1/2, *y*, -*z*+1/2; #3 *x*-1/2, *y*, -*z*+1/2.

**Table S2.** Selected hydrogen bonds data for [AEPH<sub>2</sub>][GeSb<sub>2</sub>S<sub>6</sub>]·CH<sub>3</sub>OH (**1**).

| D-H...A                          | D-H (Å) | H...A (Å) | D...A (Å) | <(DHA) (°) |
|----------------------------------|---------|-----------|-----------|------------|
| N(1)-H(1C)...S(3)                | 0.90    | 2.69      | 3.521(5)  | 153.7      |
| N(1)-H(1C)...S(5)                | 0.90    | 2.92      | 3.513(5)  | 124.6      |
| N(1)-H(1D)...O(1)                | 0.90    | 1.86      | 2.729(12) | 160.4      |
| N(1)-H(1D)...O(1B)               | 0.90    | 1.96      | 2.777(14) | 150.1      |
| N(3)-H(3C)...S(4) <sup>i</sup>   | 0.89    | 2.32      | 3.204(5)  | 171.3      |
| N(3)-H(3D)...S(4) <sup>ii</sup>  | 0.89    | 2.52      | 3.345(5)  | 153.6      |
| N(3)-H(3E)...S(3) <sup>iii</sup> | 0.89    | 2.71      | 3.339(5)  | 128.4      |
| N(3)-H(3E)...S(4) <sup>iii</sup> | 0.89    | 2.78      | 3.547(5)  | 144.7      |

Symmetry codes: i -x+1, -y, -z; ii -x+1/2, y-1/2, z; iii -x+3/2, y-1/2, z.

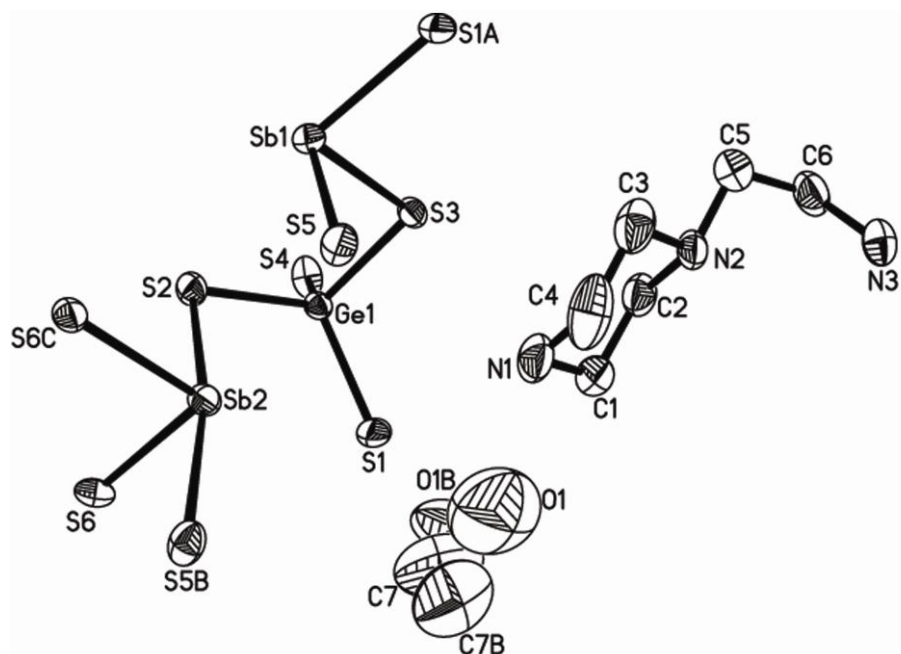

**Fig. S1** ORTEP plot showing the crystallographically asymmetric unit of **1** and the coordination geometries of metal ions; thermal ellipsoids are given at the 50% probability level. Symmetry codes for generated atoms: A) 1+x, y, z; B) x-1/2, y, 1/2-z; C) x+1/2, y, 1/2-z.

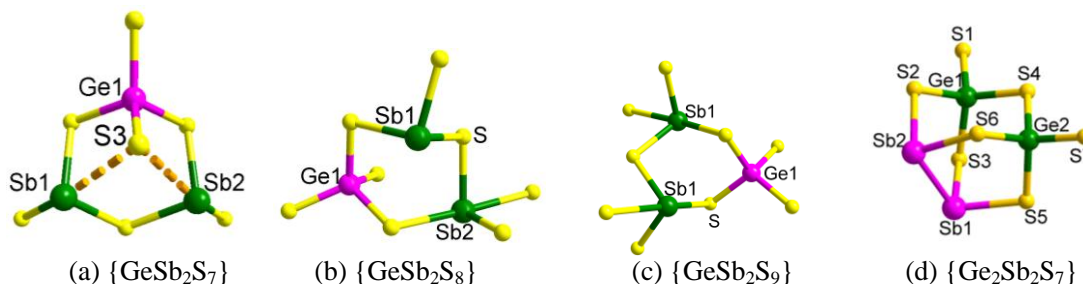

**Fig. S2** (a) {GeSb<sub>2</sub>S<sub>7</sub>} unit in 2D-[Co(dien)<sub>2</sub>]<sub>2</sub>GeSb<sub>4</sub>S<sub>10</sub> (dien = diethylenetriamine);<sup>2</sup> (b) {GeSb<sub>2</sub>S<sub>8</sub>} unit in 1D-[(Me)<sub>2</sub>NH<sub>2</sub>][DabcoH]<sub>2</sub>[Ge<sub>2</sub>Sb<sub>3</sub>S<sub>10</sub>] (Dabco = triethylenediamine), 2D-[M(en)<sub>3</sub>][GeSb<sub>2</sub>S<sub>6</sub>] (M = Mn,

Co, Ni, Ge; en = ethylenediamine);<sup>2-4</sup> (c)  $\{\text{GeSb}_2\text{S}_9\}$  unit in  $3\text{D}-[(\text{Me})_2\text{NH}_2]_2\text{GeSb}_2\text{S}_6$ ; <sup>5</sup> (d)  $\{\text{Ge}_2\text{Sb}_2\text{S}_7\}$  unit in  $0\text{D}-[\text{Me}_2\text{NH}_2]_6[(\text{Ge}_2\text{Sb}_2\text{S}_7)(\text{Ge}_4\text{S}_{10})]$ .<sup>3</sup>

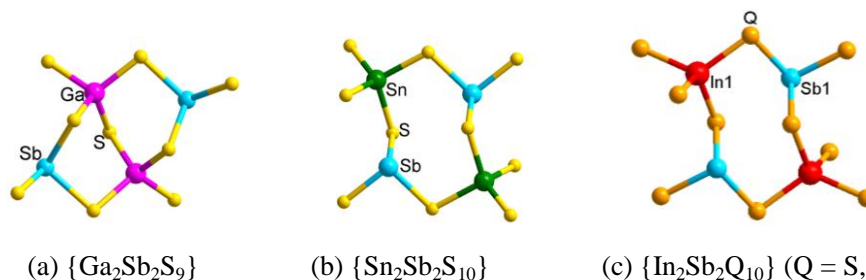

**Fig. S3** (a) The tetranuclear heterometallic unit of  $\{\text{Ga}_2\text{Sb}_2\text{S}_9\}$  in  $[\text{Ni}(\text{en})_3][\text{Ga}_2\text{Sb}_2\text{S}_7]$ ,  $[(\text{Me})_2\text{NH}_2]_2[\text{Ga}_2\text{Sb}_2\text{S}_7]$ <sup>6</sup> and  $[(\text{Me})_2\text{NH}_2]_2[\text{Ga}_2\text{Sb}_2\text{S}_7]\cdot\text{H}_2\text{O}$ ;<sup>7</sup> (b) the tetranuclear heterometallic unit of  $\{\text{Sn}_2\text{Sb}_2\text{S}_{10}\}$  in  $[\text{La}(\text{en})_4\text{SbSnS}_5]_2\cdot 0.5\text{H}_2\text{O}$ ;<sup>8</sup> (c) the tetranuclear heterometallic unit of  $\{\text{In}_2\text{Sb}_2\text{Q}_{10}\}$  (Q = S, Se) in  $[(\text{Me})_2\text{NH}_2]_2[\text{In}_2\text{Sb}_2\text{S}_{7-x}\text{Se}_x]$  ( $x = 0, 2.20, 4.20$ , and  $7$ ).<sup>9</sup>

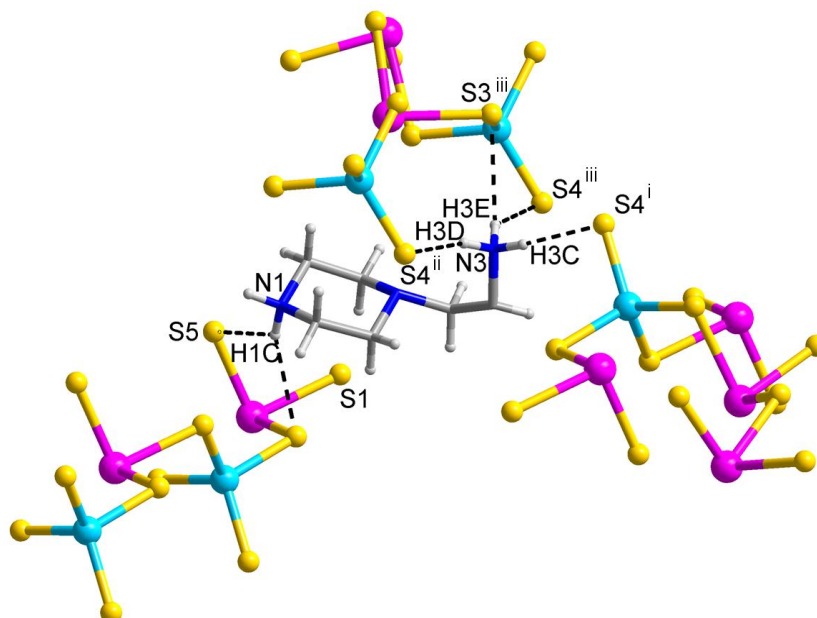

**Fig. S4** The doubly protonated N-(2-aminoethyl)piperazine cations form N–H...S hydrogen bonds with sulfur atoms from adjacent three double ribbons of  $[\text{GeSb}_2\text{S}_6]_n^{2n-}$ . The N–H...S hydrogen bond distances and angles fall in the range of 3.204(5) to 3.547(5) Å and 124.6 to 171.3°, respectively. Symmetry codes: i  $-x+1, -y, -z$ ; ii  $-x+1/2, y-1/2, z$ ; iii  $-x+3/2, y-1/2, z$ .

### 3. Physical measurements

All chemicals employed in this study were analytical reagents and commercially available without further purification. Elemental analyses of C, H, N were performed on a German Elementary Vario EL III instrument. Powder X-ray diffraction (PXRD) patterns were recorded on a Rigaku MiniFlex II diffractometer using  $\text{CuK}\alpha$  radiation. Optical diffuse reflectance spectrum was measured at room temperature with a Perkin-Elmer Lambda 900

UV/Vis spectrophotometer in the range of 200-1100 nm. A BaSO<sub>4</sub> plate was used as a standard (100% reflectance). The absorption spectrum was calculated from reflectance spectra by using the Kubelka-Munk function:  $a/S = (1-R)^2/2R$ ,<sup>10</sup> where  $a$  is the absorption coefficient,  $S$  is the scattering coefficient which is practically independent of wavelength when the particle size is larger than 5 μm, and  $R$  is the reflectance. Thermogravimetric analysis was carried out with a NETZSCH STA 449F3 unit at a heating rate of 5 °C/min under a nitrogen atmosphere.

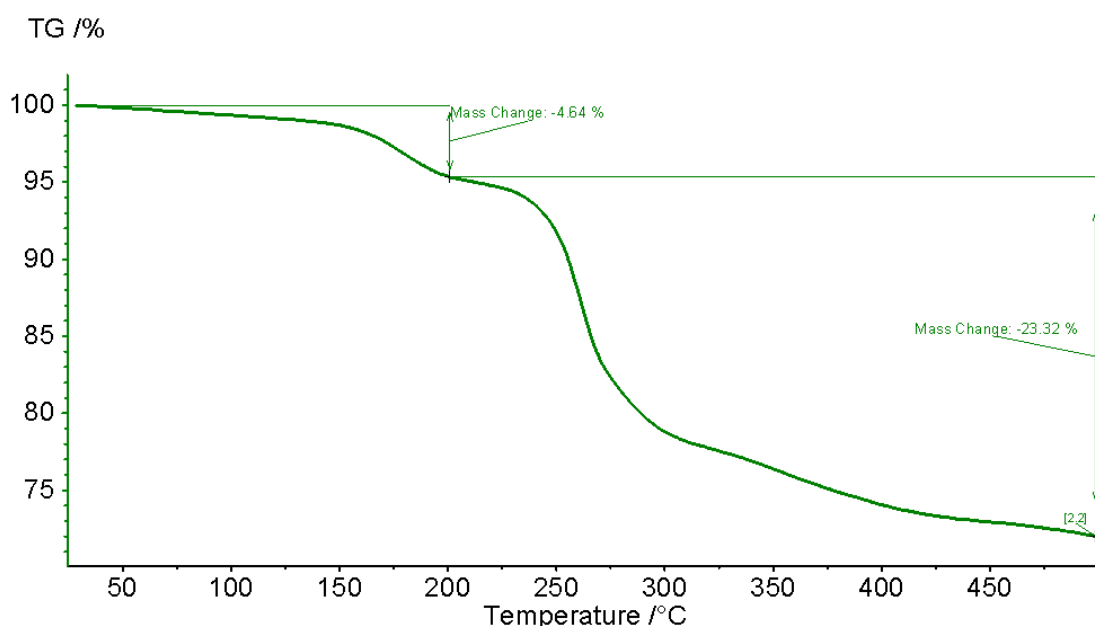

**Fig. S5** Thermogravimetric curve for **1**.

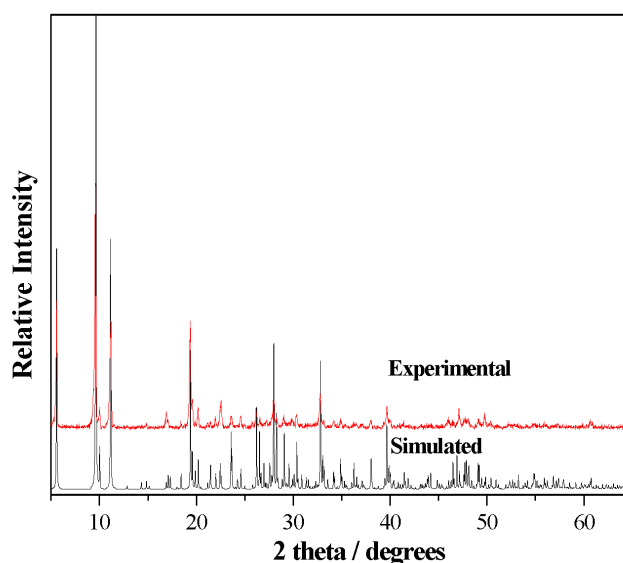

**Fig. S6** The PXRD pattern of **1** (red) is in good agreement with that simulated from single crystal X-ray data of **1** (black).

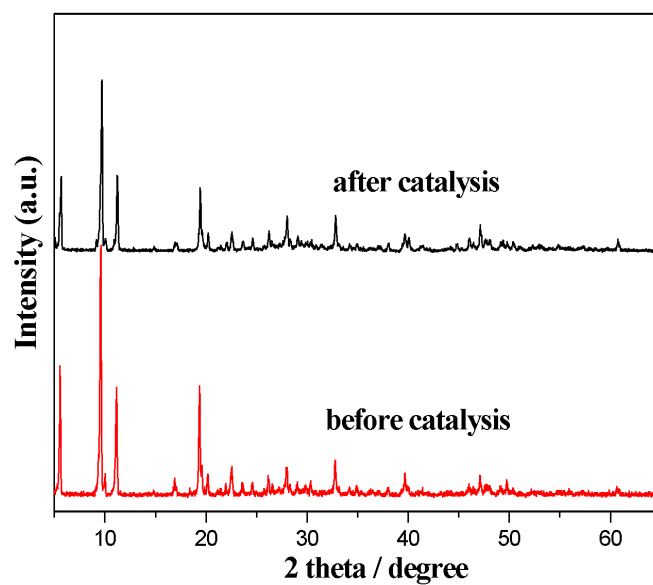

**Fig. S7** The PXRD pattern of **1** after catalysis (black) is in good agreement that of **1** before catalysis (red).

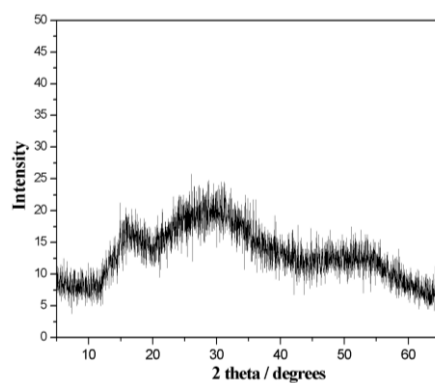

**Fig. S8** The PXRD pattern of the TG residue of **1**

#### 4. Theoretical band structure

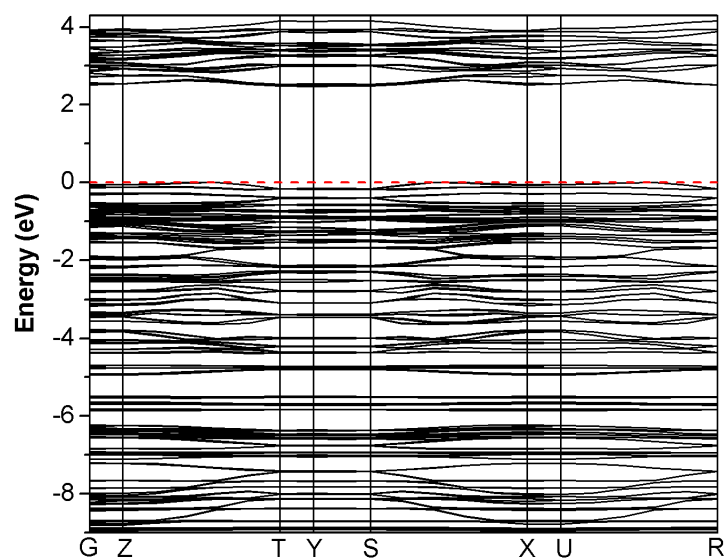

**Fig. S9** The band structure of **1**. Fermi level is set at 0 eV (red dot line).

**Table S3.** The state energies (eV) of the lowest conduction band (L-CB) and the highest valence band (H-VB) of **1**.

| k-point                  | L-CB    | H-VB     |
|--------------------------|---------|----------|
| G (0.000, 0.000, 0.000)  | 2.51161 | -0.04854 |
| Z (0.000, 0.000, 0.500)  | 2.53161 | -0.05957 |
| T (-0.500, 0.000, 0.500) | 2.4898  | -0.1639  |
| Y (-0.500, 0.000, 0.000) | 2.4747  | -0.15497 |
| S (-0.500, 0.500, 0.000) | 2.49107 | -0.1572  |
| X (0.000, 0.500, 0.000)  | 2.51578 | -0.04959 |
| U (0.000, 0.500, 0.500)  | 2.53639 | -0.05979 |
| R (-0.500, 0.500, 0.500) | 2.50493 | -0.16587 |

## References:

1. G. M. Sheldrick, *SHELXS97 and SHELXL97*, University of Göttingen, Germany, **1997**.
2. J. Zhou, L. T. An, X. Liu, L. J. Huang and X. J. Huang, *Dalton Trans.*, 2011, **40**, 11419-11424.
3. M. L. Feng, W. W. Xiong, D. Ye, J. R. Li and X. Y. Huang, *Chem. Asian J.*, 2010, **5**, 1817-1823.
4. A. V. Powell and R. Mackay, *J. Solid State Chem.*, 2011, **184**, 3144-3149.
5. M. L. Feng, D. N. Kong, Z. L. Xie and X. Y. Huang, *Angew. Chem. Int. Ed.*, 2008, **47**, 8623-8626.
6. N. Ding and M. G. Kanatzidis, *Nat. Chem.*, 2010, **2**, 187-191.
7. M. L. Feng, Z. L. Xie and X. Y. Huang, *Inorg. Chem.*, 2009, **48**, 3904-3906.
8. M. L. Feng, D. Ye and X. Y. Huang, *Inorg. Chem.*, 2009, **48**, 8060-8062.
9. K. Y. Wang, M. L. Feng, D. N. Kong, S. J. Liang, L. Wu and X. Y. Huang, *CrystEngComm*, 2012, **14**, 90-94.
10. Wendlandt, W. M.; Hecht, H. G. *Reflectance Spectroscopy*, Interscience, New York, **1966**.
